# Supplementary material
Source: PubMed Central journal article supplement (PMC3417323)
Supplement: NIHMS346039-supplement-01.pdf [file NIHMS346039-supplement-01.pdf]

Analytical expressions for the homotropic binding of ligand to protein dimers and trimers

**Supplementary Material**

Scott T. Lefurgy<sup>1,2</sup> and Thomas S. Leyh<sup>1, §</sup>

<sup>1</sup>Department of Microbiology & Immunology, Albert Einstein College of Medicine, Bronx, NY

10461

<sup>2</sup>Current Address: Department of Chemistry, Hofstra University, Hempstead, NY 11549

**§ Corresponding Author:**

Thomas S. Leyh, Ph.D.

Albert Einstein College of Medicine

1300 Morris Park Ave.

Bronx, NY 10461

Phone: 718-430-2857

FAX: 718-430-8711

Email: [tom.leyh@einstein.yu.edu](mailto:tom.leyh@einstein.yu.edu)

### *Divalent Interactions*

For a dimeric protein binding to ligand [1], the concentrations of species in solution are governed by mass conservation relationships (Eqns. S1 and S2).

$$E_T = E + \Sigma EL_1 + EL_2 \quad (S1)$$

$$L_T = L + \Sigma EL_1 + 2EL_2 \quad (S2)$$

Each binding step can be described by a site dissociation constant that describes the affinity of ligand for a particular protomer. If the sites are identical, as in a homodimer, the site constants for either protomer at a given step ( $k_i$ ) will be equivalent. In the case of a heterodimer, each protomer has a different affinity for the ligand, and for the first binding step this difference is accounted for by the coefficient  $c_0$  multiplied by  $k_1$ ; for the second step, the difference in the second dissociation constant  $k_2$  is given by  $c_1$ . The site ( $k_i$ ) and aggregate ( $K_i$ ) dissociation constants (Figure 1, main text) are related by statistical factors that take these coefficients into account, either for homomeric proteins with identical subunits ( $c_j = 1$ ) (cf. Eqn. 9, *Theory*) or non-identical ( $c_j \neq 1$ ) (Eqns. S3 and S4).

$$K_1 = \frac{1}{\alpha} k_{1(site)} \quad (S3)$$

$$K_2 = \alpha k_{2(site)} \quad (S4)$$

where

$$\alpha = 1 + \frac{1}{c_0}$$

By substituting expressions of the dissociation constants (Eqns. 6, 7 and 8, *Theory* and Eqns. S3 and S4) into the mass conservation equations (S1 and S2), we obtain a cubic polynomial in  $L$  (Eqn. S5).

$$L^3 + pL^2 + qL + r = 0 \quad (\text{S5})$$

where

$$p = 2E_T + \alpha k_2 - L_T$$

$$q = k_1 k_2 + \alpha k_2 E_T - \alpha k_2 L_T$$

$$r = -k_1 k_2 L_T$$

The general solution to this cubic is described below in *Trimeric Interactions*.

The value of  $L$  is then used to solve for the equilibrium concentrations of all other species (Eqns. S6-S8).

$$E = \frac{k_1 k_2 E_T}{k_1 k_2 + \alpha k_2 L + L^2} \quad (\text{S6})$$

$$\Sigma EL_1 = \frac{\alpha k_2 E_T L}{k_1 k_2 + \alpha k_2 L + L^2} \quad (\text{S7})$$

$$EL_2 = \frac{E_T L^2}{k_1 k_2 + \alpha k_2 L + L^2} \quad (\text{S8})$$

### *Trivalent Interactions*

Fourth-degree polynomials are of the highest order that can be solved analytically [2]. Many methods have been put forth to solve the quartic [3]. Descartes' 1637 method, which factors the quartic into two quadratics is used here [4-6].

The quartic is first reduced through the substitution  $L = y - a/4$  to remove the cubic term (Eqn. S9).

$$y^4 + ey^2 + fy + g = 0 \quad (\text{S9})$$

where

$$e = b - \frac{3a^2}{8}$$

$$f = c + \frac{a^3}{8} - \frac{ab}{2}$$

$$g = d - \frac{3a^4}{256} + \frac{a^2b}{16} - \frac{ac}{4}$$

The reduced quartic is then factored into two quadratics (Eqn. S10)

$$y^4 + ey^2 + fy + g = (y^2 + hy + j) \left( y^2 - hy + \frac{g}{j} \right) \quad (\text{S10})$$

by making the substitutions given by Eqns. S11-S13.

$$e = \frac{g}{j} + j - h^2 \quad (\text{S11})$$

$$f = h \left( \frac{g}{j} - j \right) \quad (\text{S12})$$

$$j = \frac{e + h^2 - \frac{f}{h}}{2} \quad (\text{S13})$$

To obtain  $h$ , Eqns. 19-21 are rearranged to obtain a cubic polynomial in  $h^2$  (Eqn. S14).

$$h^6 + 2eh^4 + (e^2 - 4g)h^2 - f^2 = 0 \quad (\text{S14})$$

Eqn. S14 has a general form whose solution is known (Eqn. S15) [7].

$$y^3 + py^2 + qy + r = 0 \quad (\text{S15})$$

where

$$y = h^2$$

$$p = 2e$$

$$q = e^2 - 4g$$

$$r = f^2$$

By making the substitution  $y = z - p/3$ , the squared term is removed (Eqn. S16).

$$z^3 - sz - t = 0 \quad (\text{S16})$$

where

$$s = \frac{p^2}{3} - q$$

$$t = -\frac{2p^3}{27} + \frac{pq}{3} - r$$

Only one of the three roots of Eqn. S16 corresponds to the physically relevant quantity,  $L$ . Due to the constraint that  $E_T$ ,  $L_T$ ,  $k_1$ ,  $k_2$  and  $k_3$  must be positive, the unique root can be selected from among the possible solutions by examining the sign of the discriminant ( $\Delta$ ) (Eqn. S17), allowing automation of the solution in a fitting algorithm (see Supplementary Excel worksheet).

$$\Delta = \frac{t^2}{4} - \frac{s^3}{27} \quad (\text{S17})$$

When  $\Delta > 0$ , there is one real solution (Eqn. S18) [1].

$$z_1 = \sqrt[3]{\frac{t}{2} + \sqrt{\frac{t^2}{4} - \frac{s^3}{27}}} + \sqrt[3]{\frac{t}{2} - \sqrt{\frac{t^2}{4} - \frac{s^3}{27}}} \quad (\text{S18})$$

When  $\Delta < 0$ , there are three real solutions (Eqns. S19-S21) [8].

$$z_1 = \frac{2}{3}\sqrt{(p^2 - 3q)} \cos \frac{\theta}{3} \quad (\text{S19})$$

$$z_2 = \frac{2}{3}\sqrt{(p^2 - 3q)} \cos \frac{2\pi - \theta}{3} \quad (\text{S20})$$

$$z_3 = \frac{2}{3}\sqrt{(p^2 - 3q)} \cos \frac{2\pi + \theta}{3} \quad (\text{S21})$$

where

$$\theta = \cos^{-1} \frac{-2p^3 + 9pq - 27r}{2\sqrt{(p^2 - 3q)^3}}$$

The physically relevant root corresponds to  $z_1$  [8].

When  $\Delta = 0$ , two of the roots are identical, and either of the above equations yields the correct root. When one of the roots is zero,  $t = 0$  and Eqn. S16 can be reduced in degree; the identical (positive) roots are given by  $z_1 = z_2 = \sqrt{s}$ . This is the relevant root, with the exception of the trivial case  $L = 0$  when  $L_T = 0$ .

Once  $z$  has been determined using one of the methods above,  $h^2$  is obtained using the substitution:

$$h^2 = z - \frac{p}{3} \quad (\text{S22})$$

To simplify the arithmetic going forward, any positive, real root  $h^2$  is chosen for calculations in Excel; taking the square root,  $h$  is obtained, and  $j$  is calculated from  $e, f$  and  $h$  (Eqn. S13).

At this point, the two quadratics in  $y$  (Eqn. S10) can be written in  $L$ ,  $a$ ,  $g$ ,  $h$  and  $j$  (using the substitution  $L = y - a/4$ ) (Eqns. S23-S24) and solved for roots  $L_1$  thru  $L_4$  (Eqns. S25-S28).

$$L^2 + \left(\frac{a}{2} + h\right)L + \left(\frac{a^2}{16} + \frac{ah}{4} + j\right) = 0 \quad (\text{S23})$$

$$L^2 + \left(\frac{a}{2} - h\right)L + \left(\frac{a^2}{16} - \frac{ah}{4} + \frac{g}{j}\right) = 0 \quad (\text{S24})$$

$$L_1 = \frac{-\left(\frac{a}{2} + h\right) + \sqrt{\left(\frac{a}{2} + h\right)^2 - 4\left(\frac{a^2}{16} + \frac{ah}{4} + j\right)}}{2} \quad (\text{S25})$$

$$L_2 = \frac{-\left(\frac{a}{2} + h\right) - \sqrt{\left(\frac{a}{2} + h\right)^2 - 4\left(\frac{a^2}{16} + \frac{ah}{4} + j\right)}}{2} \quad (\text{S26})$$

$$L_3 = \frac{-\left(\frac{a}{2} - h\right) + \sqrt{\left(\frac{a}{2} - h\right)^2 - 4\left(\frac{a^2}{16} - \frac{ah}{4} + \frac{g}{j}\right)}}{2} \quad (\text{S27})$$

$$L_4 = \frac{-\left(\frac{a}{2} - h\right) - \sqrt{\left(\frac{a}{2} - h\right)^2 - 4\left(\frac{a^2}{16} - \frac{ah}{4} + \frac{g}{j}\right)}}{2} \quad (\text{S28})$$

Only one of the four roots corresponds to the equilibrium concentration,  $L$ . To determine which root is relevant, it is necessary to inspect the discriminant for both of the quadratic equations, given by  $\Delta_1$  for roots  $L_1$  and  $L_2$  and  $\Delta_2$  for roots  $L_3$  and  $L_4$  (Eqns. S29-S30).

$$\Delta_1 = h^2 - 4j \quad (\text{S29})$$

$$\Delta_2 = h^2 - \frac{4g}{j} \quad (\text{S30})$$

When both  $\Delta_1$  and  $\Delta_2$  are positive, there are four real roots, and  $L_3$  is the relevant root. When either  $\Delta_1$  or  $\Delta_2$  is positive, there are two real roots of opposite sign and the positive root is the relevant root.

#### References

- [1] E.T. Mack, R. Perez-Castillejos, Z. Suo, and G.M. Whitesides, Exact analysis of ligand-induced dimerization of monomeric receptors. *Anal Chem* 80 (2008) 5550-5.
- [2] N.H. Abel, Beweis der Unmöglichkeit, algebraische Gleichungen von höheren Graden als dem vierten allgemein aufzulösen. *J reine angew Math* 1 (1826) 65-84.
- [3] R.S. Ball, Notes on the algebraical solution of biquadratic equations. *Quarterly Journal of Pure and Applied Mathematics* 7 (1866) 6-9, 358-369.
- [4] R. Descartes, *La Geometrie*, 1637.
- [5] K. Manders, Algebra in Roth, Faulhaber, and Descartes. *Historia Mathematica* 33 (2006) 184-209.
- [6] The Math Forum @ Drexel, Solving the Quartic. 2011. Retrieved July 19, 2011 from <http://mathforum.org/library/drmath/view/52874.html>.
- [7] W.D. Lambert, A generalized Trigonometric Solution of the Cubic Equation. *The American Mathematical Monthly* 13 (1906) 73-76.
- [8] Z.X. Wang, An exact mathematical expression for describing competitive binding of two different ligands to a protein molecule. *FEBS Lett* 360 (1995) 111-4.
